# Supplementary material for: Thymocid®, a Standardized Black Cumin (Nigella sativa) Seed Extract, Modulates Collagen Cross-Linking, Collagenase and Elastase Activities, and Melanogenesis in Murine B16F10 Melanoma Cells
Source: PubMed Central journal article supplement (PMC7400895; doi:10.3390/nu12072146), 2020-07-19
Supplement: nutrients-12-02146-s001.pdf [file nutrients-12-02146-s001.pdf]

# Supplementary Materials

## Thymocid<sup>®</sup>, A Standardized Black Cumin (*Nigella sativa*) Seeds Extract, Modulates Collagen Cross-Linking, Collagenase and Elastase Activities, and Melanogenesis in Murine B16F10 Melanoma Cells

Huifang Li <sup>1,2</sup>, Nicholas A. DaSilva <sup>2</sup>, Weixi Liu <sup>3</sup>, Jialin Xu <sup>2,4</sup>, George W. Dombi <sup>3</sup>, Joel A. Dain <sup>3</sup>, Dongli Li <sup>1</sup>, Jean Christopher Chamcheu <sup>5</sup>, Navindra P. Seeram <sup>2</sup>, Hang Ma <sup>1,2\*</sup>

<sup>1</sup> School of Biotechnology and Health Sciences, Wuyi University; International Healthcare Innovation Institute (Jiangmen), Jiangmen 529020, China; huifang\_li@uri.edu (H.L.); wyuchemldl@126.com (D.L.)

<sup>2</sup> Bioactive Botanical Research Laboratory, Department of Biomedical and Pharmaceutical Sciences, College of Pharmacy, University of Rhode Island, Kingston, RI 02881, USA; NickDasilva91@gmail.com (N.A.D.); nseeram@uri.edu (N.P.S.); hang\_ma@uri.edu (H.M.)

<sup>3</sup> Department of Chemistry, University of Rhode Island, Kingston, RI 02881, USA; weixi\_liu@my.uri.edu (W.L.); gdombi@chm.uri.edu (G.W.D.); jdain@chm.uri.edu (J.A.D.)

<sup>4</sup> Institute of Biochemistry and Molecular Biology, College of Life and Health Sciences, Northeastern University, Shenyang 110819, China; jialin\_xu@mail.neu.edu.cn (J.X.)

<sup>5</sup> School of Basic Pharmaceutical and Toxicological Sciences, College of Pharmacy, University of Louisiana at Monroe, Monroe, LA 71209, USA; chamcheu@ulm.edu (J.C.C.)

\*Correspondence: hang\_ma@uri.edu; Tel.: +1-401-874-7654

### List of contents

|                                                                                          |   |
|------------------------------------------------------------------------------------------|---|
| <b>Figure S1.</b> HPLC chromatograms of Thymocid <sup>®</sup> .....                      | 3 |
| <b>Figure S2.</b> Standard curve for quantification of TQ in Thymocid <sup>®</sup> ..... | 4 |
| <b>Table S1.</b> Inhibitory effect of TQ on collagenase activity.....                    | 5 |
| <b>Table S2.</b> Inhibitory effect of TQ on elastase activity.....                       | 6 |
| <b>Table S3.</b> Inhibitory effect of TQ on tyrosinase activity.....                     | 7 |

**A**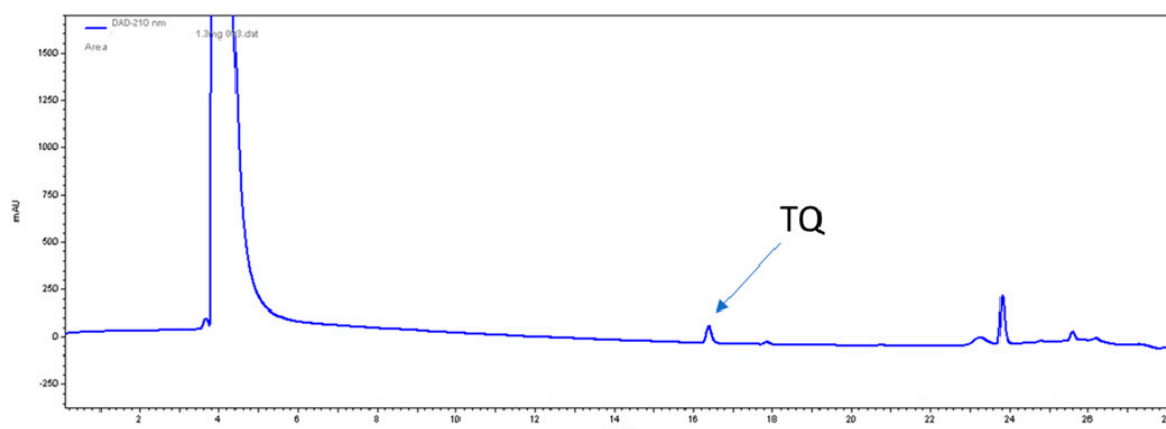**B**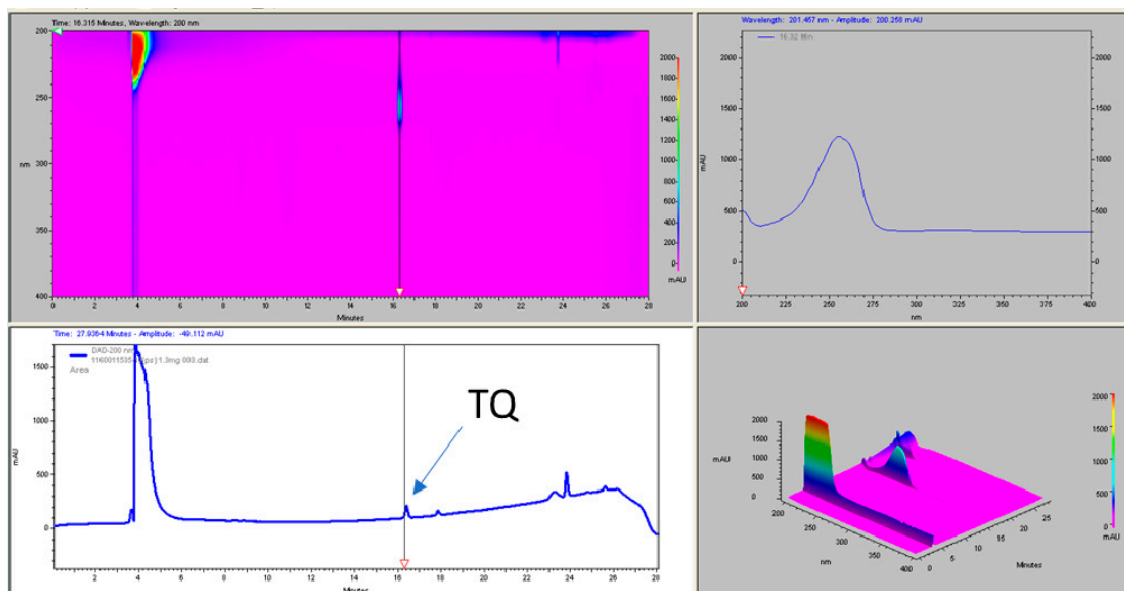

**Figure S1.** HPLC chromatograms of Thymocid® and TQ was monitored at the wavelength of 210 nm (A) and a mixed wavelength ranging from 200-400 nm (B)

| Concentration ( $\mu\text{g/mL}$ ) | AUC      |
|------------------------------------|----------|
| 1                                  | 126011   |
| 5                                  | 2106298  |
| 10                                 | 4472913  |
| 50                                 | 34805071 |
| 100                                | 67556237 |

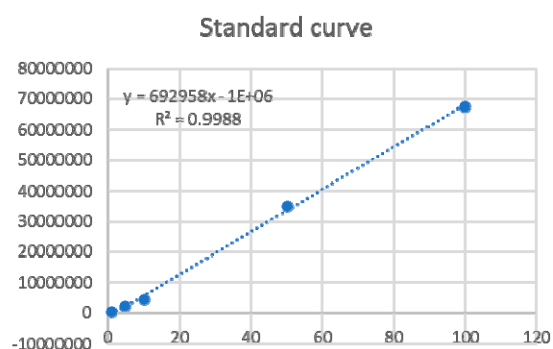

**Figure S2.** Standard curve used for the quantification of TQ in Thymocid®.

**Table S1.** Inhibitory activity of TQ on collagenase enzyme.

| Sample            | Concentration ( $\mu\text{g/mL}$ ) | Enzyme activity (%) |
|-------------------|------------------------------------|---------------------|
| TQ                | 1000                               | 30.0 $\pm$ 7.6      |
|                   | 500                                | 18.7 $\pm$ 5.0      |
|                   | 250                                | 14.7 $\pm$ 7.1      |
|                   | 125                                | 21.7 $\pm$ 11.1     |
|                   | 62.5                               | 18.0 $\pm$ 5.7      |
| phen <sup>a</sup> | 10                                 | 98.4 $\pm$ 4.5      |

<sup>a</sup>Positive control.

**Table S2.** Inhibitory activity of TQ on elastase enzyme.

| Sample            | Concentration<br>( $\mu\text{g}/\text{mL}$ ) | Inhibition rate (%) |                |
|-------------------|----------------------------------------------|---------------------|----------------|
|                   |                                              | Type-I              | Type-III       |
| TQ                | 1000                                         | 30.2 $\pm$ 0.1      | 45.3 $\pm$ 1.9 |
|                   | 500                                          | 27.1 $\pm$ 2.0      | 36.6 $\pm$ 5.3 |
|                   | 250                                          | 20.2 $\pm$ 2.8      | 26.9 $\pm$ 1.4 |
|                   | 125                                          | 18.1 $\pm$ 3.3      | 19.3 $\pm$ 5.3 |
|                   | 62.5                                         | 16.1 $\pm$ 1.0      | 12.9 $\pm$ 2.9 |
| EGCG <sup>a</sup> | 92                                           | 73.0 $\pm$ 1.8      | 75.2 $\pm$ 4.0 |

<sup>a</sup>Positive control.

**Table S3.** Inhibitory effect of TQ on tyrosinase enzyme.

| Sample                  | Concentration<br>( $\mu\text{g}/\text{mL}$ ) | Enzyme activity (%) |                  |
|-------------------------|----------------------------------------------|---------------------|------------------|
|                         |                                              | L-tyrosine          | L-DOPA           |
| TQ                      | 1000                                         | 110.8 $\pm$ 1.7     | 117.7 $\pm$ 9.3  |
|                         | 500                                          | 113.3 $\pm$ 1.8     | 115.2 $\pm$ 6.3  |
|                         | 250                                          | 119.8 $\pm$ 9.7     | 123.8 $\pm$ 8.7  |
|                         | 125                                          | 124.5 $\pm$ 8.5     | 114.8 $\pm$ 16.5 |
|                         | 62.5                                         | 120.7 $\pm$ 8.6     | 100.8 $\pm$ 4.8  |
| Kojic acid <sup>a</sup> | 10                                           | 49.5 $\pm$ 3.0      | 66.2 $\pm$ 13.2  |

<sup>a</sup>Positive control.
